# Supplementary figures and images for: Single-cell analysis of bidirectional reprogramming between early embryonic states reveals mechanisms of differential lineage plasticities
Source: PubMed Central journal article supplement — bioRxiv. 2023 Mar 29:2023.03.28.534648. Preprint. [Version 1] doi: 10.1101/2023.03.28.534648 (PMC10081288; doi:10.1101/2023.03.28.534648), 2023-03-29

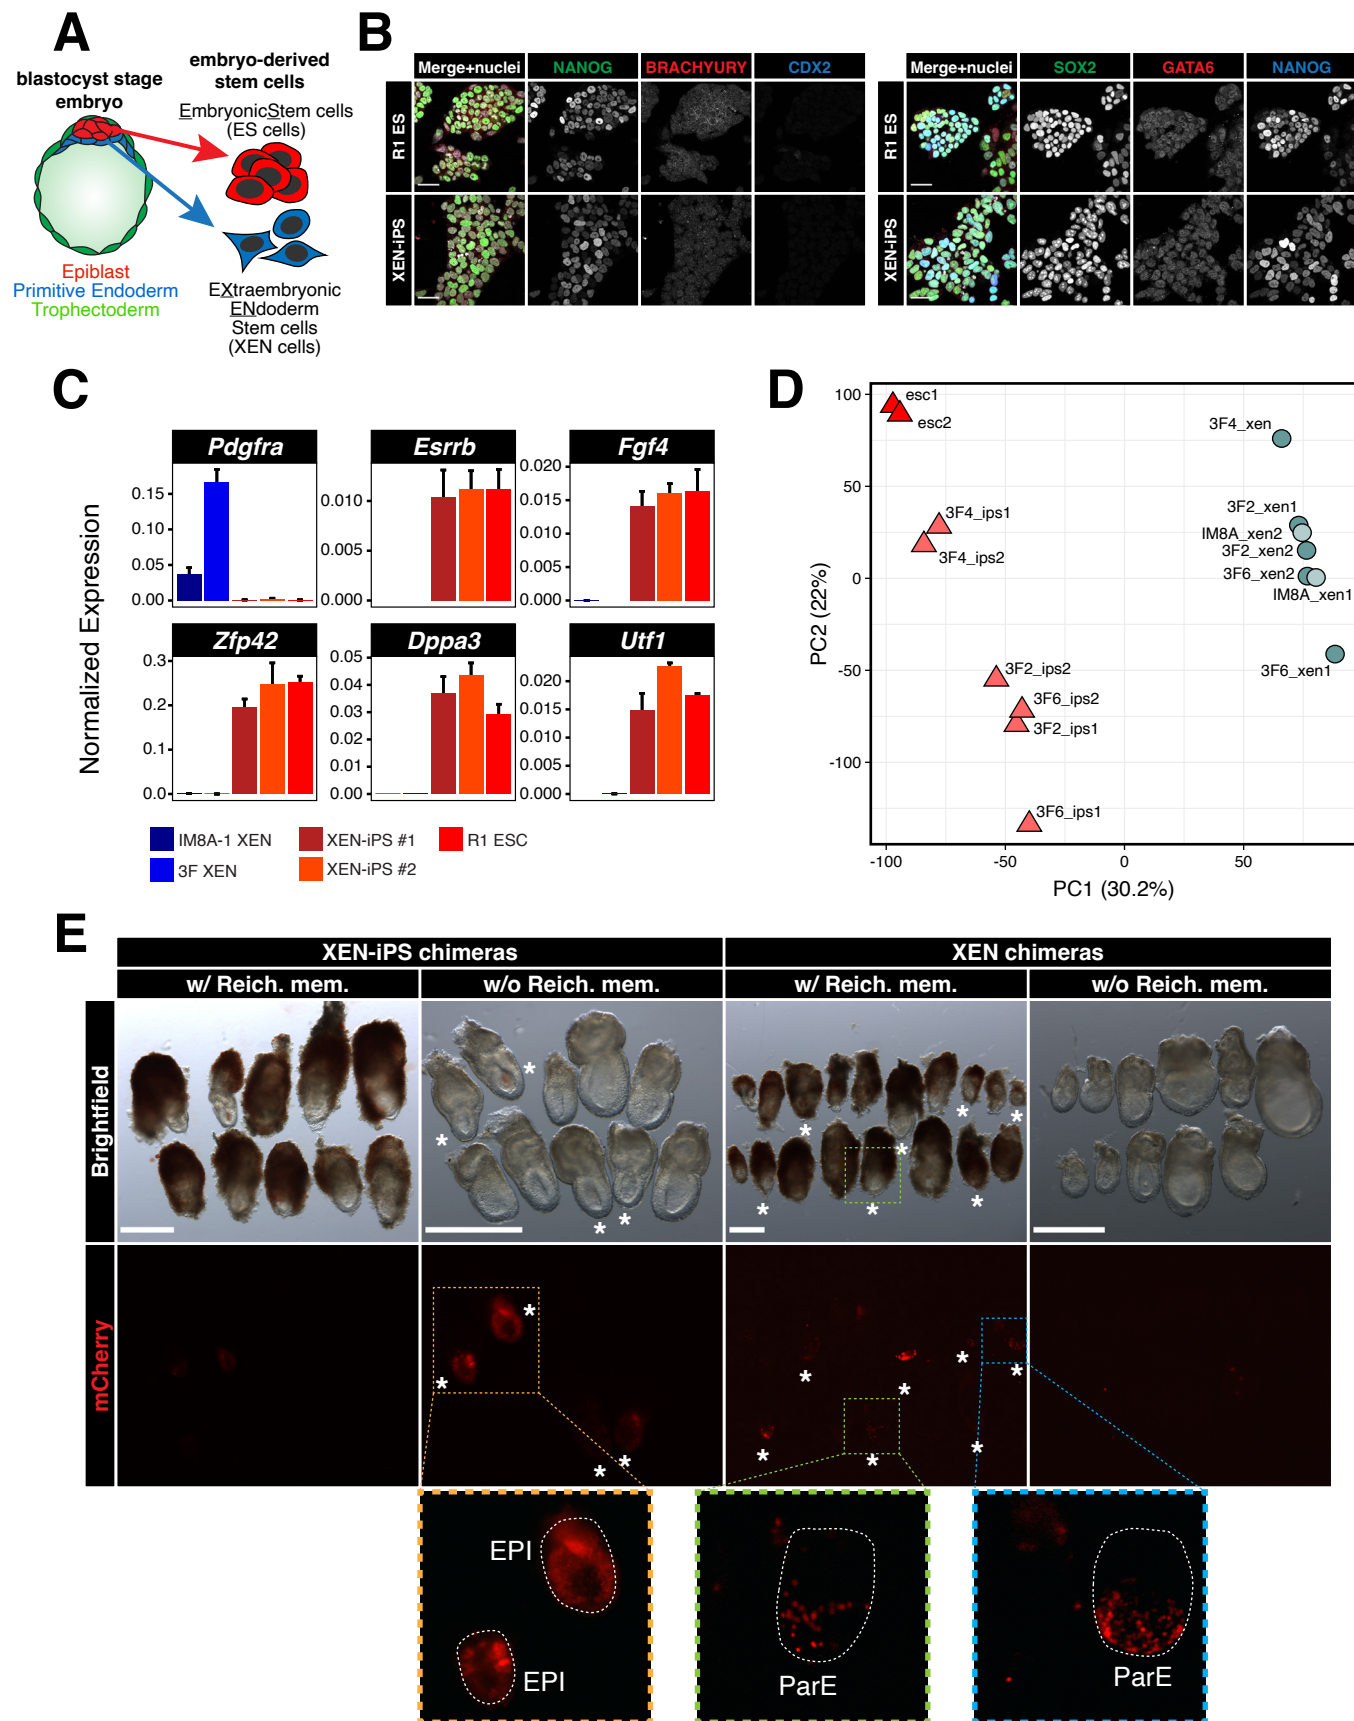

**A**

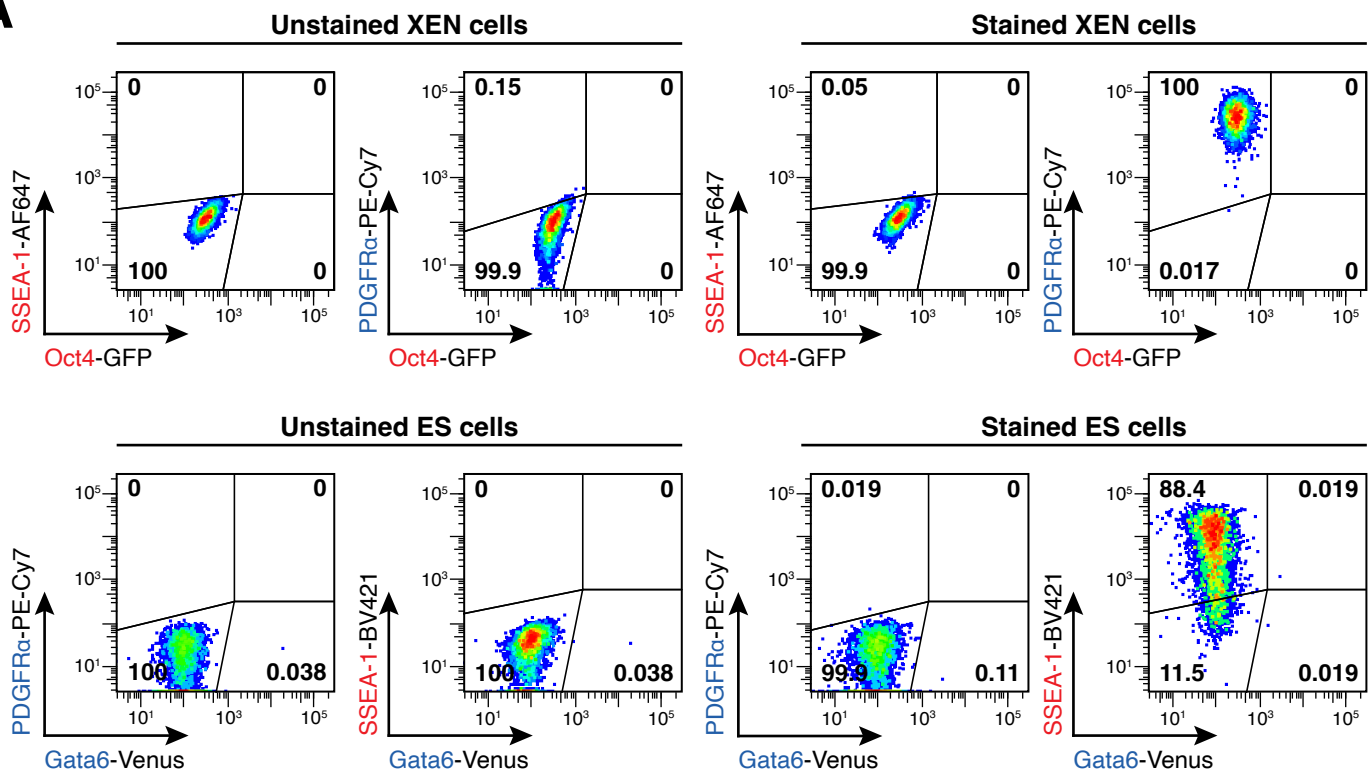

**B**

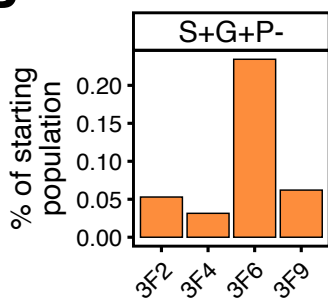

**C**

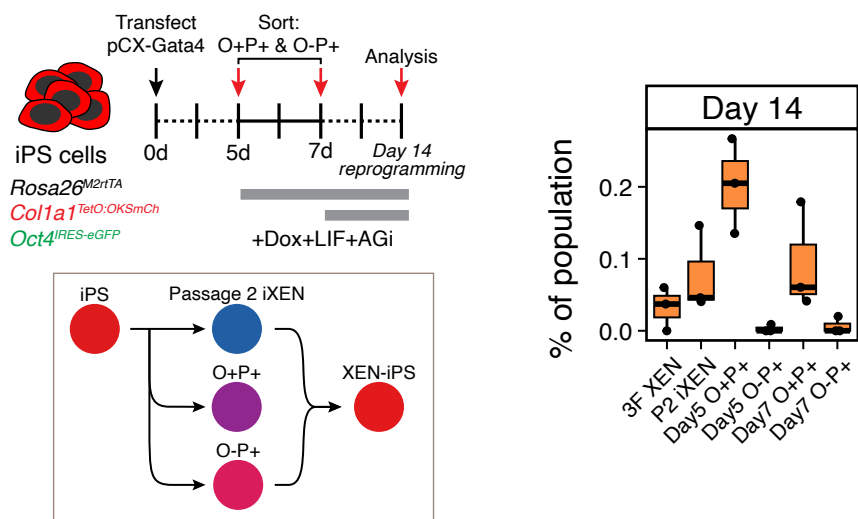

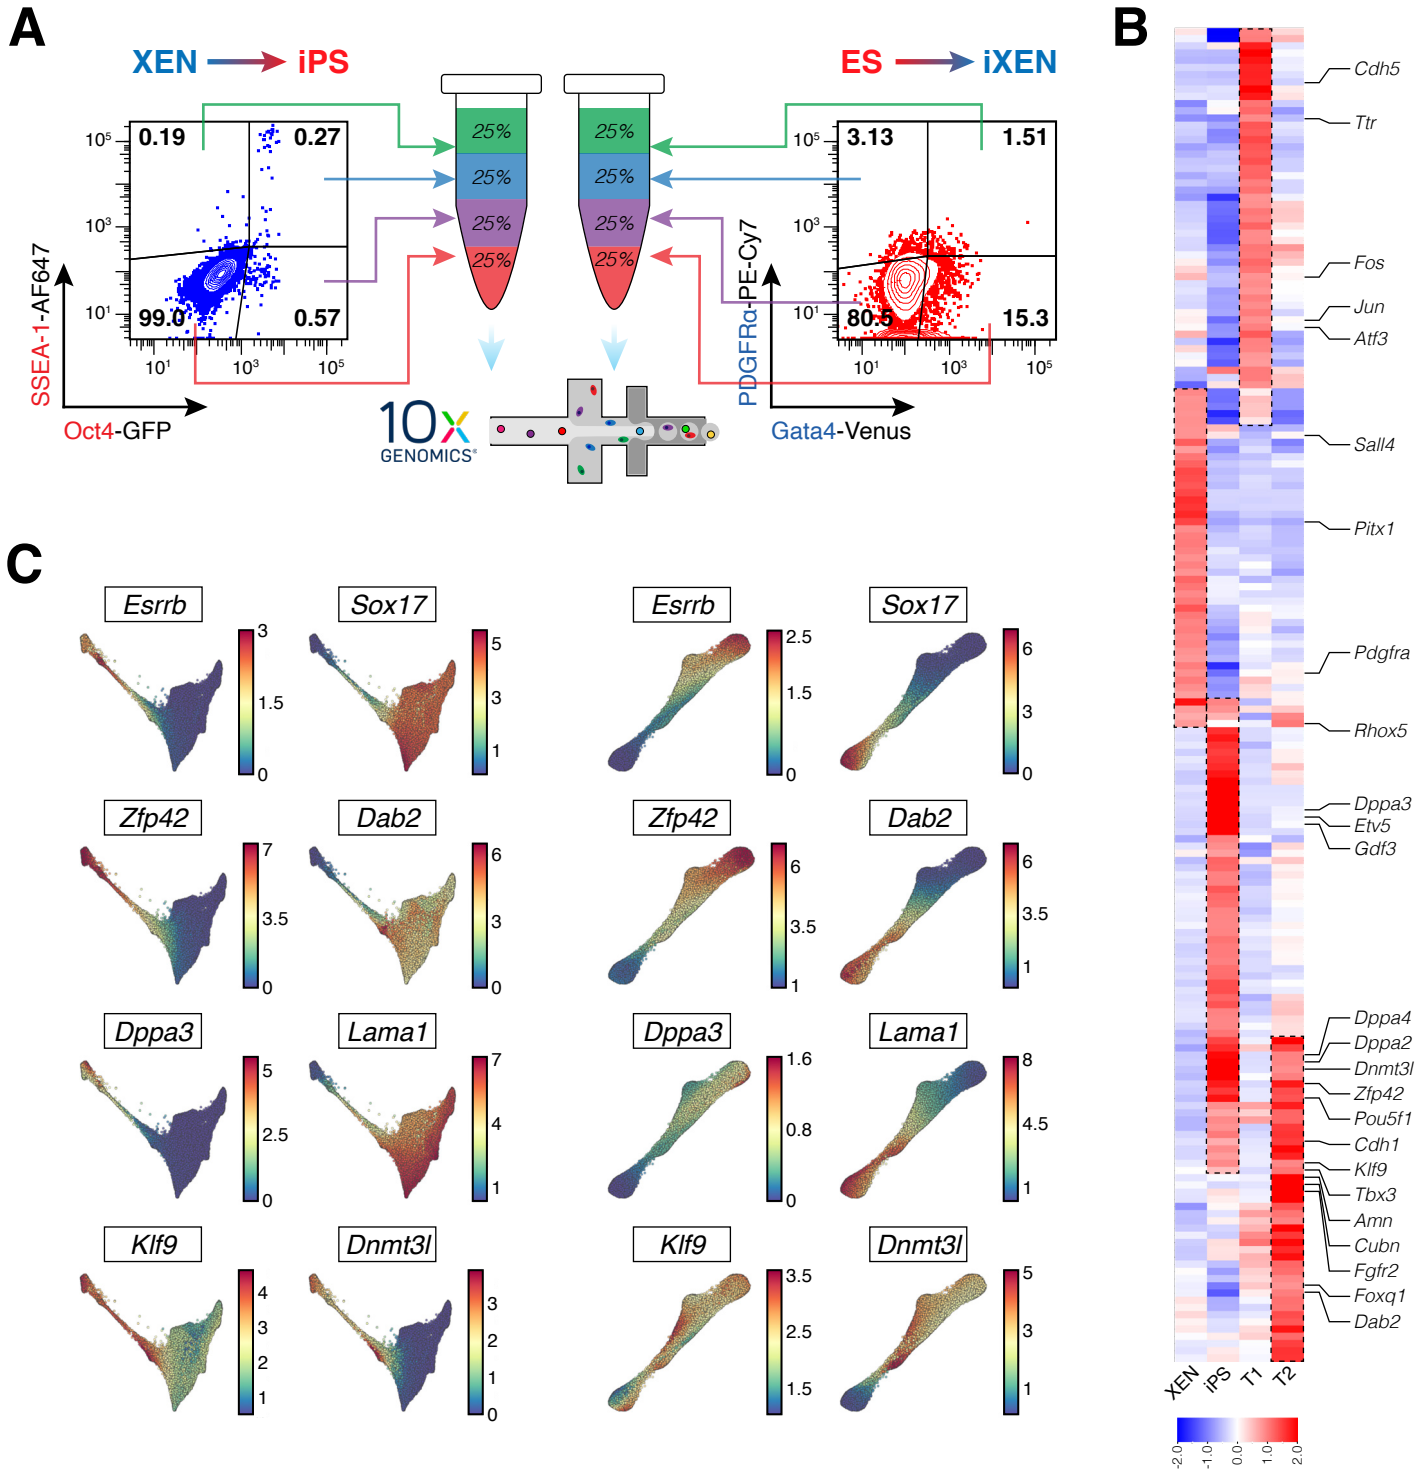

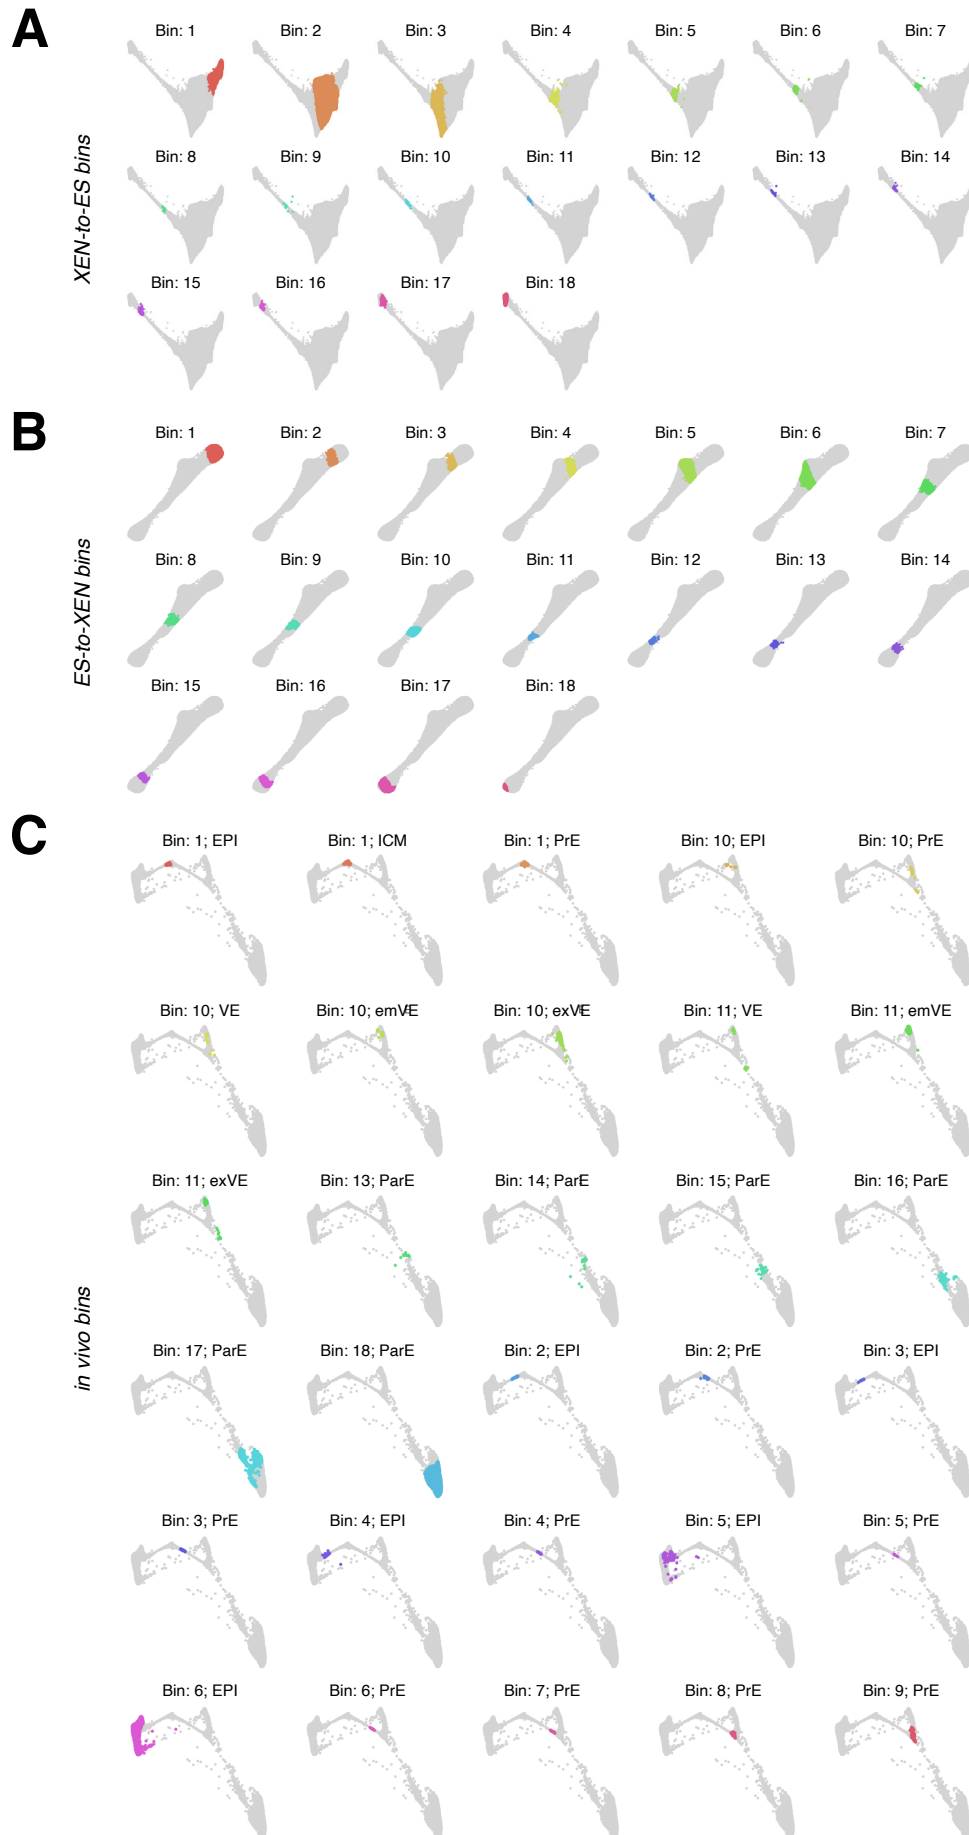

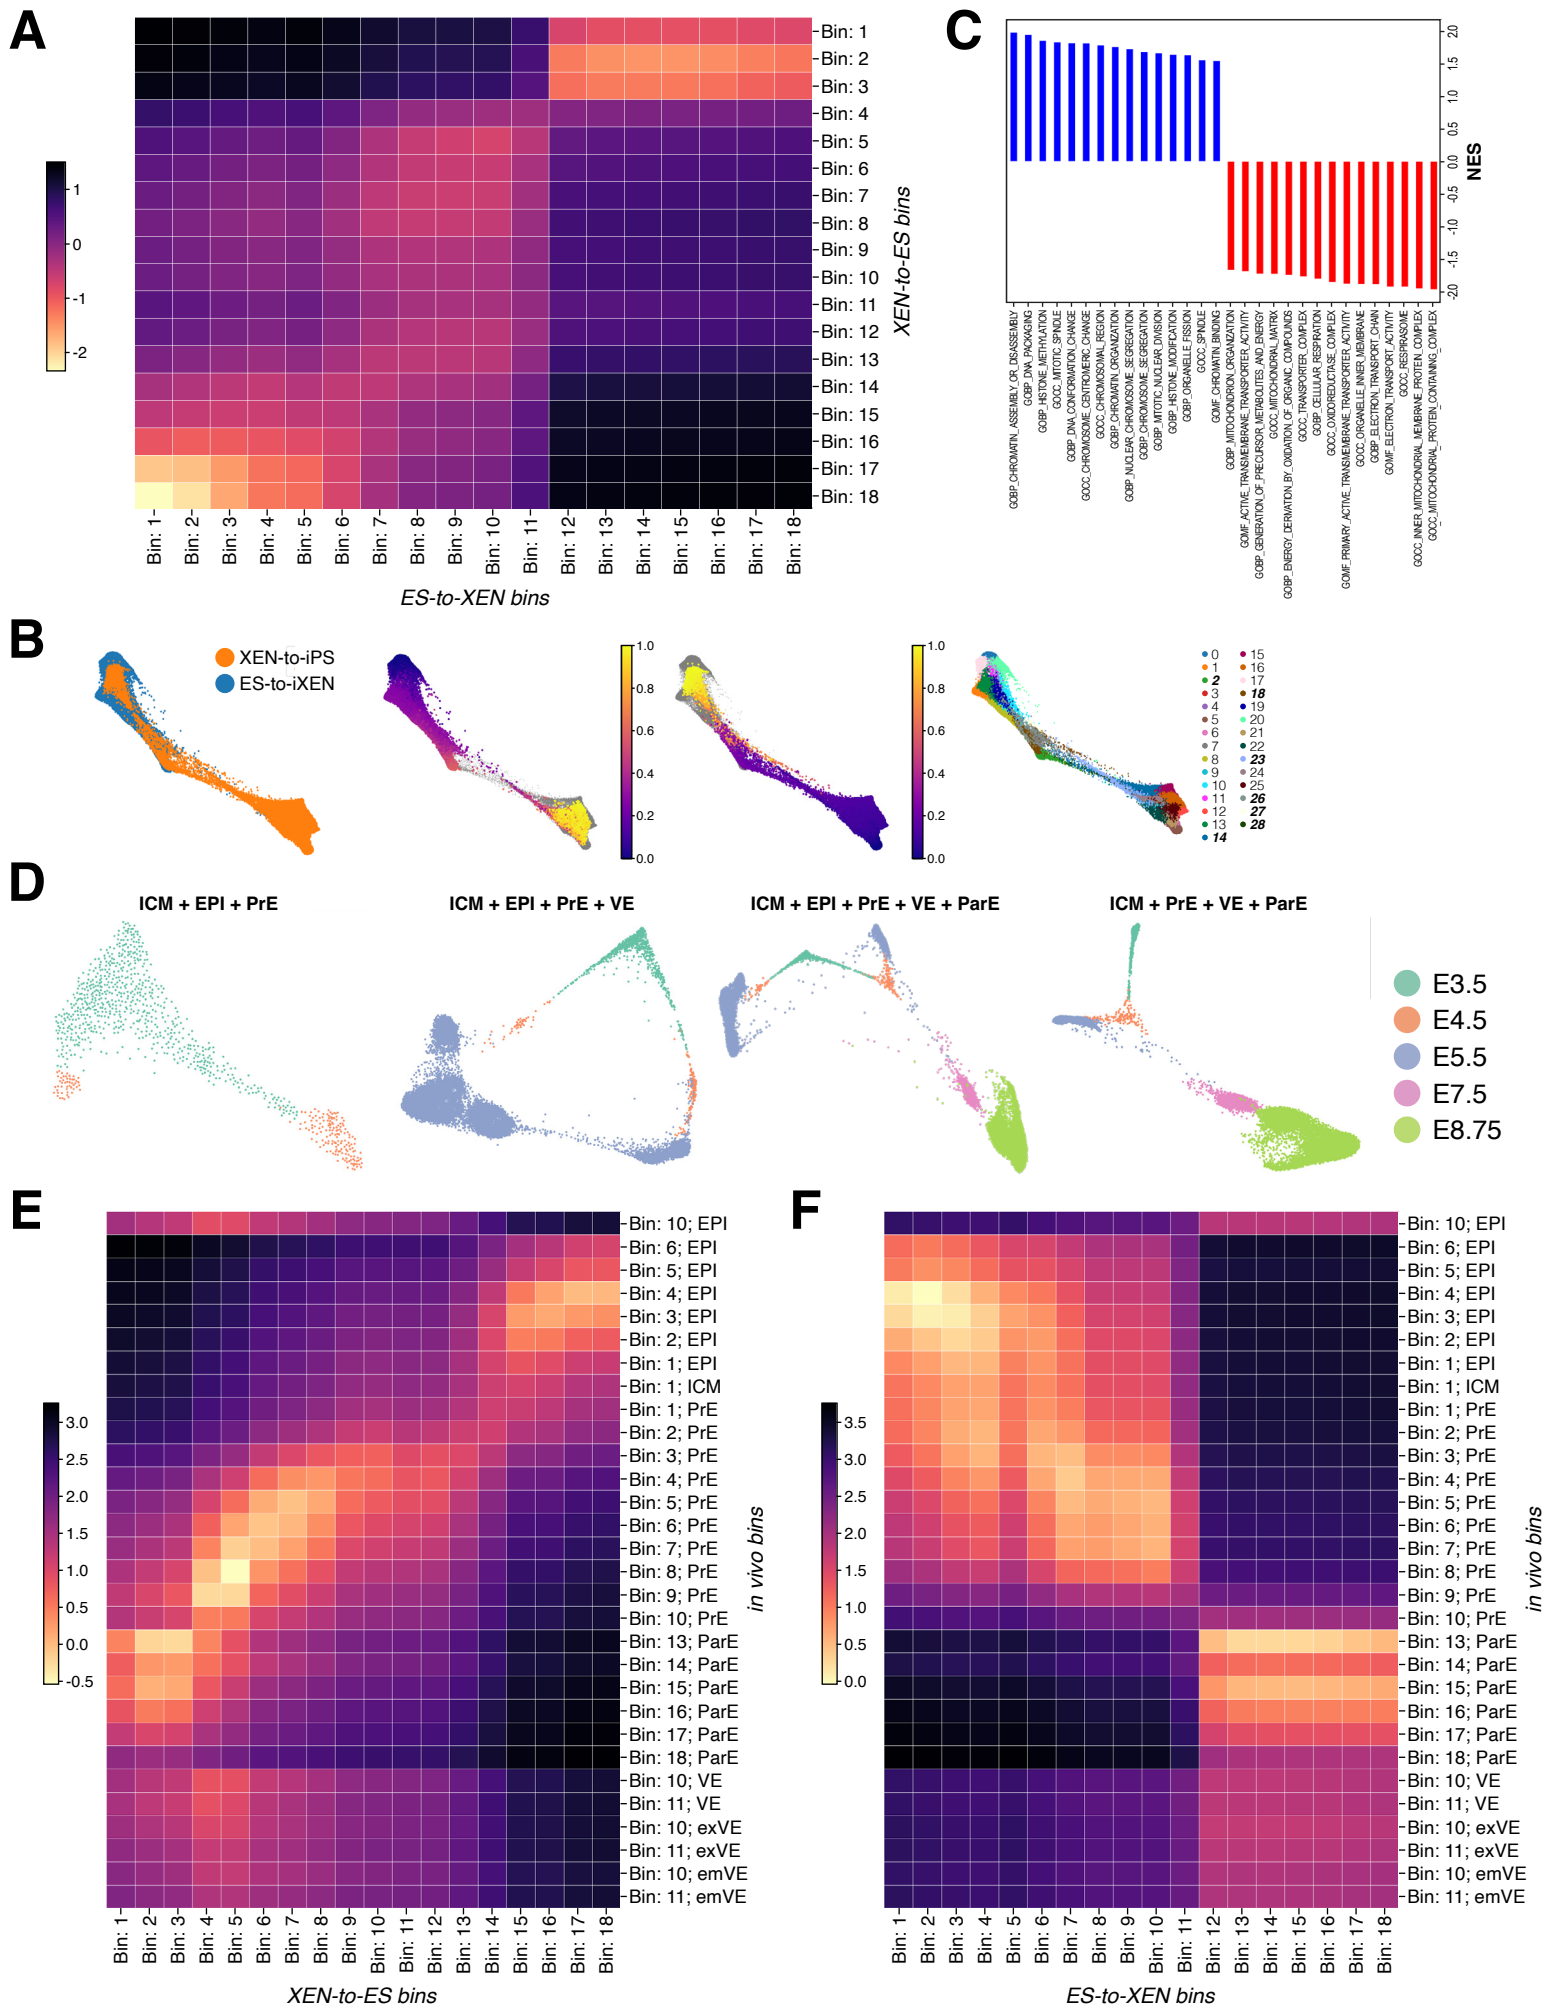



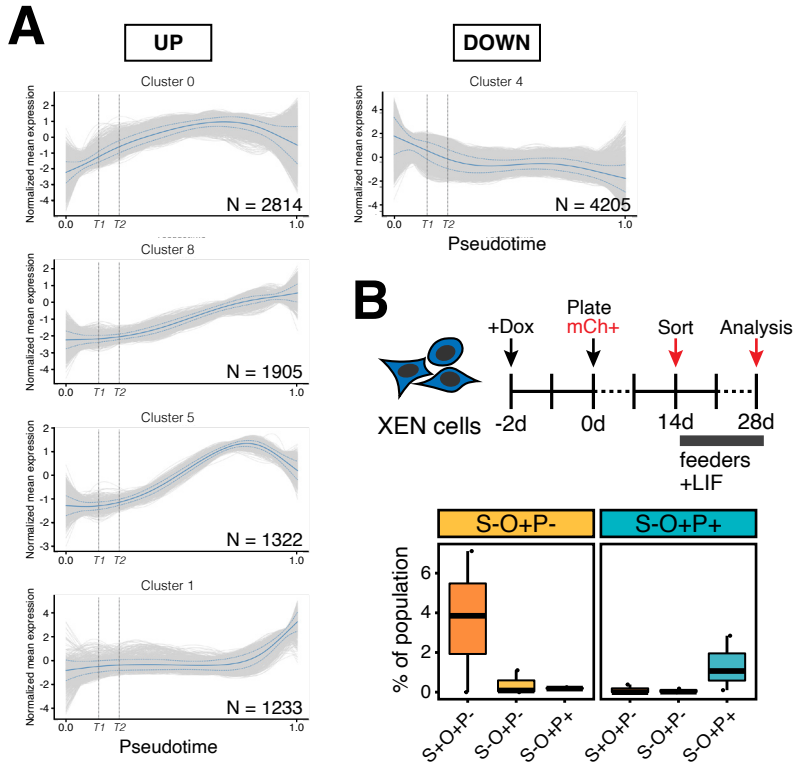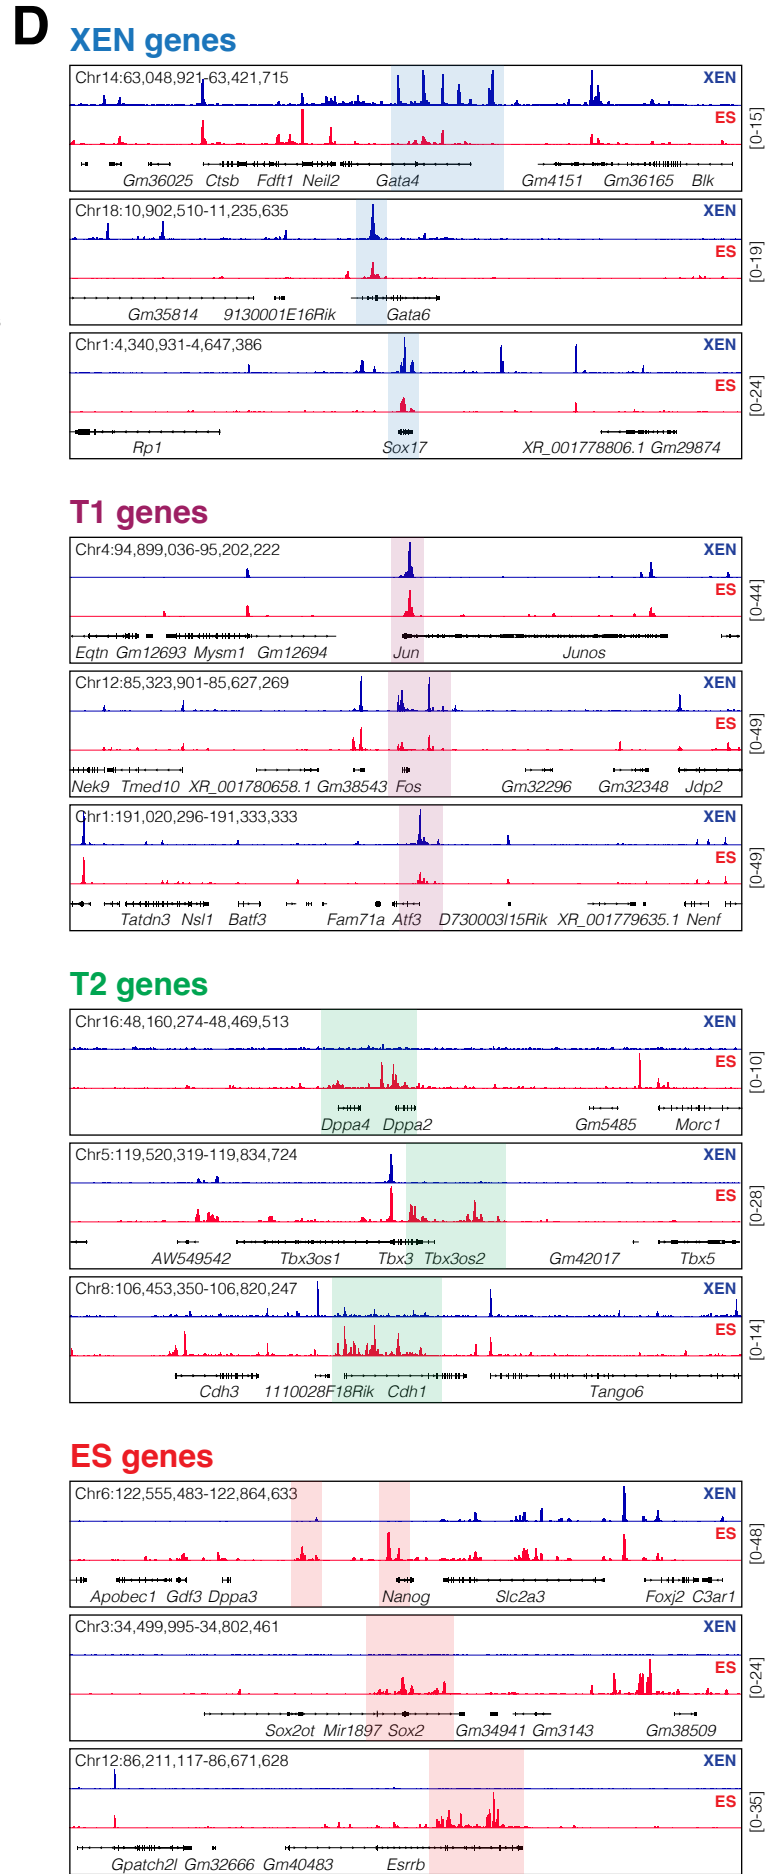

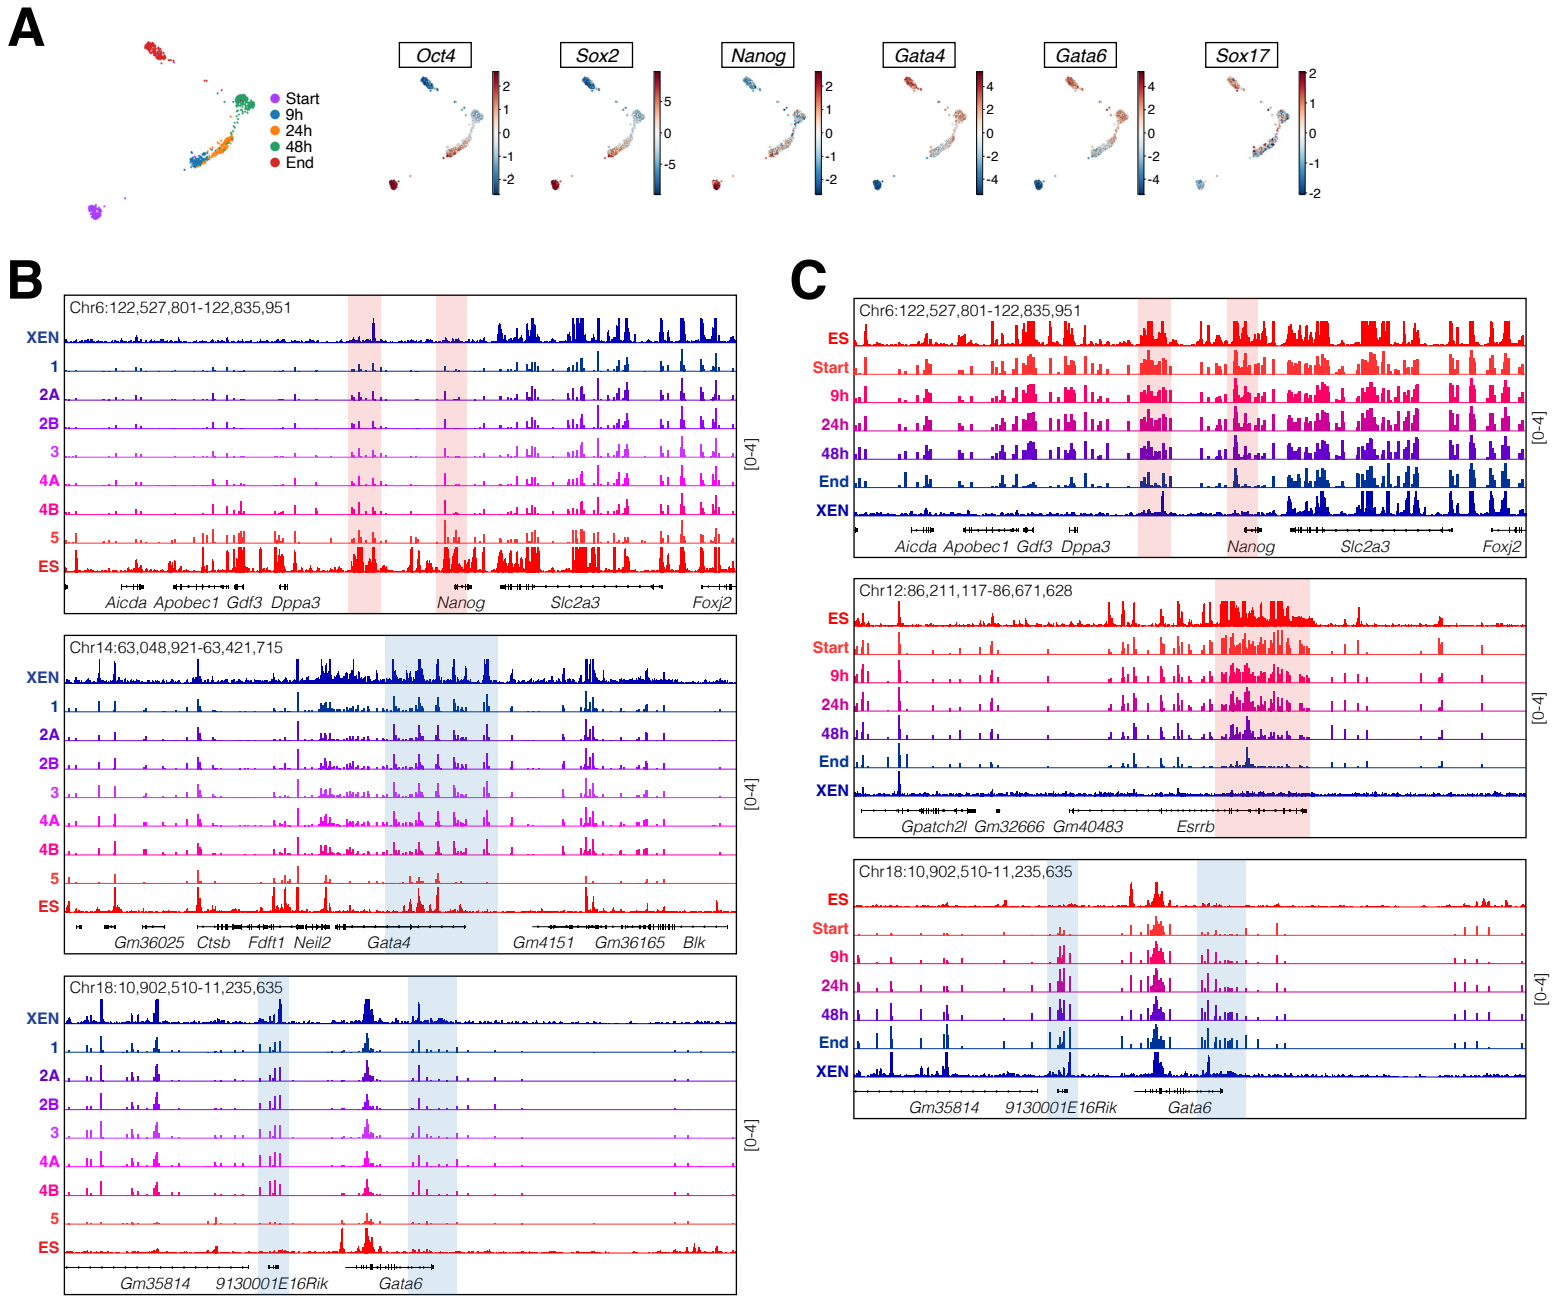

Supplement: NIHPP2023.03.28.534648v1-supplement-1.pdf [file NIHPP2023.03.28.534648v1-supplement-1.pdf]
